# Supplementary material for: The exploration of network motifs as potential drug targets from post-translational regulatory networks
Source: PubMed Central journal article supplement (PMC4744934; doi:10.1038/srep20558), 2016-02-08
Supplement: srep20558-s1.pdf [file srep20558-s1.pdf]

Supplementary information for

## **The exploration of network motifs as potential drug targets from post-translational regulatory networks**

**Xiao-Dong Zhang<sup>1,2,†</sup>, Jiangning Song<sup>3,4,†</sup>, Peer Bork<sup>5,\*</sup>, and Xing-Ming Zhao<sup>1,\*</sup>**

<sup>1</sup>Department of Computer Science, School of Electronics and Information Engineering, Tongji University, Shanghai 201804, China

<sup>2</sup>Shanghai Water (Ocean) Administrative Service Center, Shanghai 200050, China

<sup>3</sup>Tianjin Institute of Industrial Biotechnology, Chinese Academy of Sciences, Tianjin 300308, China

<sup>4</sup>Department of Biochemistry and Molecular Biology, Faculty of Medicine, Monash University, Melbourne, VIC 3800, Australia

<sup>5</sup>European Molecular Biology Laboratory, Meyerhofstraße 1, Heidelberg 69117, Germany

\*Correspondence and requests for materials should be addressed to X.M.Z. (xm\_zhao@tongji.edu.cn) or P.B. (bork@embl.de)

<sup>†</sup>These authors contributed equally to this work.

**Supplementary Table S1. Motif I identified with the FANMOD tool.** The detailed information about member proteins of motif I.

**Supplementary Table S2. Motif II identified with the FANMOD tool.** The detailed information about member proteins of motif II.

**Supplementary Table S3. Motif III identified with the FANMOD tool.** The detailed information about member proteins of motif III.

**Supplementary Table S4. Motif IV identified with the FANMOD tool.** The detailed information about member proteins of motif IV.

**Supplementary Table S5. Motif V identified with the FANMOD tool.** The detailed information about member proteins of motif V.

**Supplementary Table S6. Motif VI identified with the FANMOD tool.** The detailed information about member proteins of motif VI.

**Supplementary Table S7. The motif types in which kinases/phosphatases and proteases act as drug targets.**

**Supplementary Table S8. Cases of six motif that can be used as targets of multi-target agents or combinatorial drugs, where the drugs target the interacting protein pairs tend to share similar therapeutic effects.** The first three columns list proteins in motif; the fourth and fifth columns are interacting protein pair targeted by drugs; the sixth is the therapeutic similarity denoted by the first level of ATC code; and the last one lists the common drug(s) (denoted with Drugbank ID) if any of the drugs targeting the protein pair are the same.

**Supplementary Table S9. The novel drug targets predicted by NetTar, and the validation of predictions with information from TTD and STITCH database.**

**Supplementary Table S10. The human phosphorylation regulation network.** The first column lists kinases/phosphatases, and the second column lists their corresponding substrates.

**Supplementary Table S11. The human proteolysis regulation network.** The first column lists proteases, and the second column lists their corresponding substrates.
